# Supplementary material for: A questionnaire-based study of Paediatric Dentists’ knowledge of teething signs, symptoms and management
Source: Springer Nature journal article supplement (doi:10.1038/s41405-022-00099-4), 2022-03-12
Supplement: MOESM1 [file 41405_2022_99_MOESM1_ESM.pdf]

## Appendix 1. Questionnaire form

### Paediatric dentists knowledge on teething

Please find the participant information sheet here – <http://tinyurl.com/y4g2f363>

1. Typically who often do you give advice on teething?
  - a. Daily
  - b. Weekly
  - c. Monthly
  - d. Annually
  - e. Never
  - f. Other .....
  
2. In your experience what symptoms do you feel are attributed to teething? (you may select more than one option)
  - a. Fever
  - b. Drooling
  - c. Irritability
  - d. Flushed cheeks
  - e. Swollen gingivae
  - f. Bowel disruption
  - g. Oral “fixation” or chewing objects
  - h. Other .....
  
3. What guidance in relation to teething are you aware of?
  
4. Do you feel that there is a need for better guidance on the management of teething?
  - a. Yes
  - b. No
  - c. Unsure
  
5. Which of the following would you advise for the management of teething symptoms?
  - a. Distraction/comfort
  - b. Use of a dummy
  - c. Teething rings
  - d. Hard food to chew
  - e. Homeopathic teething gels/powders, e.g. Ashton and Parsons powder, Nelsons Teetha gel and granules
  - f. Non-homeopathic teething gels/powders, e.g. those containing a local anaesthetic

- g. Age appropriate dosage of oral systemic analgesia, e.g. paracetamol or ibuprofen
  - h. Other .....
6. Which area of the UK do you primarily work in?
- a. England
  - b. Northern Ireland
  - c. Scotland
  - d. Wales
  - e. Other.....
7. What setting best describes your primary work place
- a. Private practice
  - b. Community Dental Service (CDS)
  - c. Hospital unit (excluding dental hospital)
  - d. Dental hospital
  - e. Other .....
8. Which of the following best applies to your role?
- a. Specialist in Paediatric Dentistry
  - b. Consultant in Paediatric Dentistry
  - c. Pre-CCST trainee in Paediatric Dentistry
  - d. Post-CCST trainee in Paediatric Dentistry
  - e. Staff grade in Paediatric Dentistry
  - f. Other .....
9. In what year did you qualify with your BDS?
10. Do you recall the management of teething being taught during your undergraduate BDS degree?
- a. Yes
  - b. No
  - c. Unsure
11. Any other comments
